# Supplementary material for: Reliable identification and quantification of three diethylphenethylamines in a Dendrobium-based dietary supplement
Source: Royal Society of Chemistry journal article supplement (doi:10.1039/c4ay01452a), 2014-01-01
Supplement: c4ay01452a1.pdf [file c4ay01452a1.pdf]

## Supplemental Information

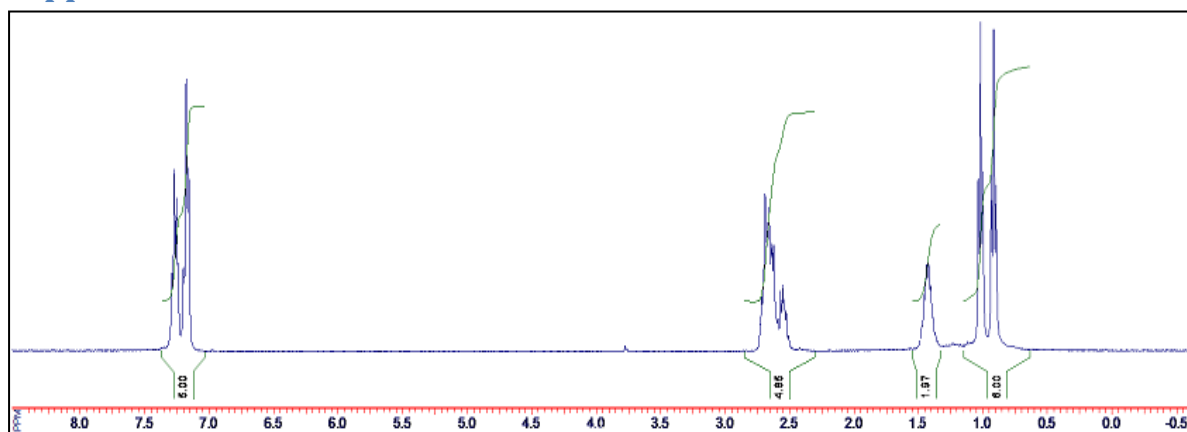

Figure S1. 1D NMR of N,α-DEPEA purchased from Enamine.

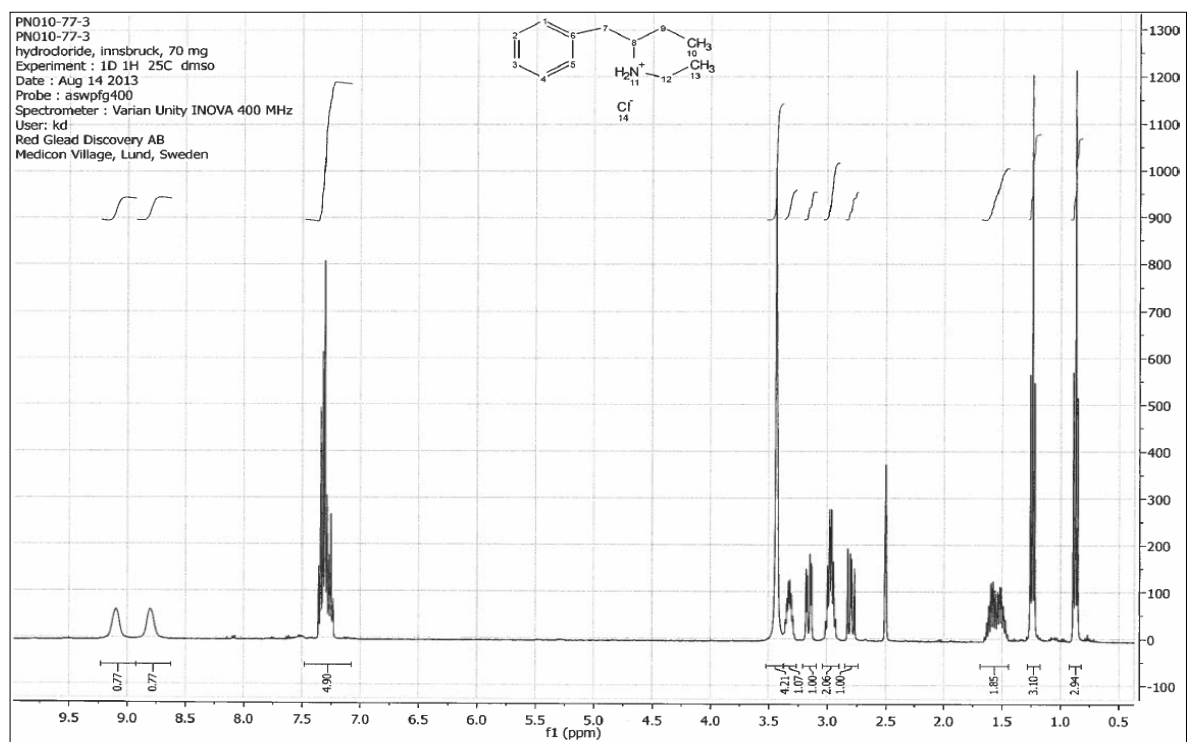

Figure S2. 1D NMR of N,α-DEPEA purchased from Red Glead Discovery

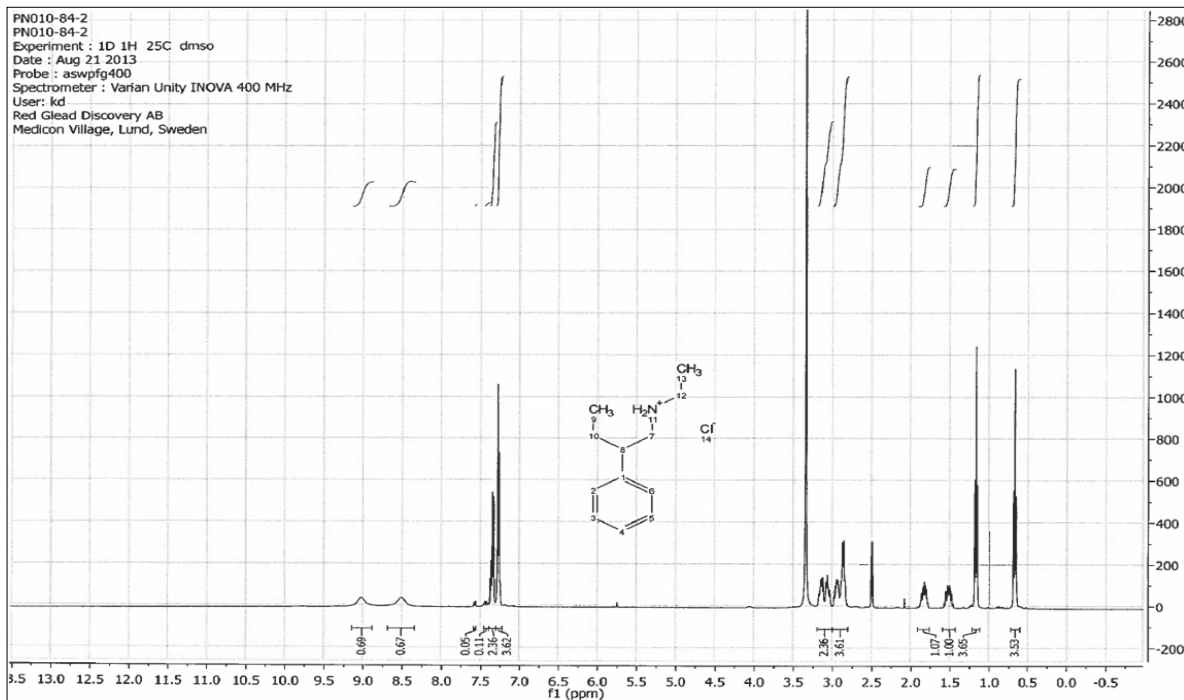

Figure S3. 1D NMR of N,β-DEPA purchased from Red Glead Discovery

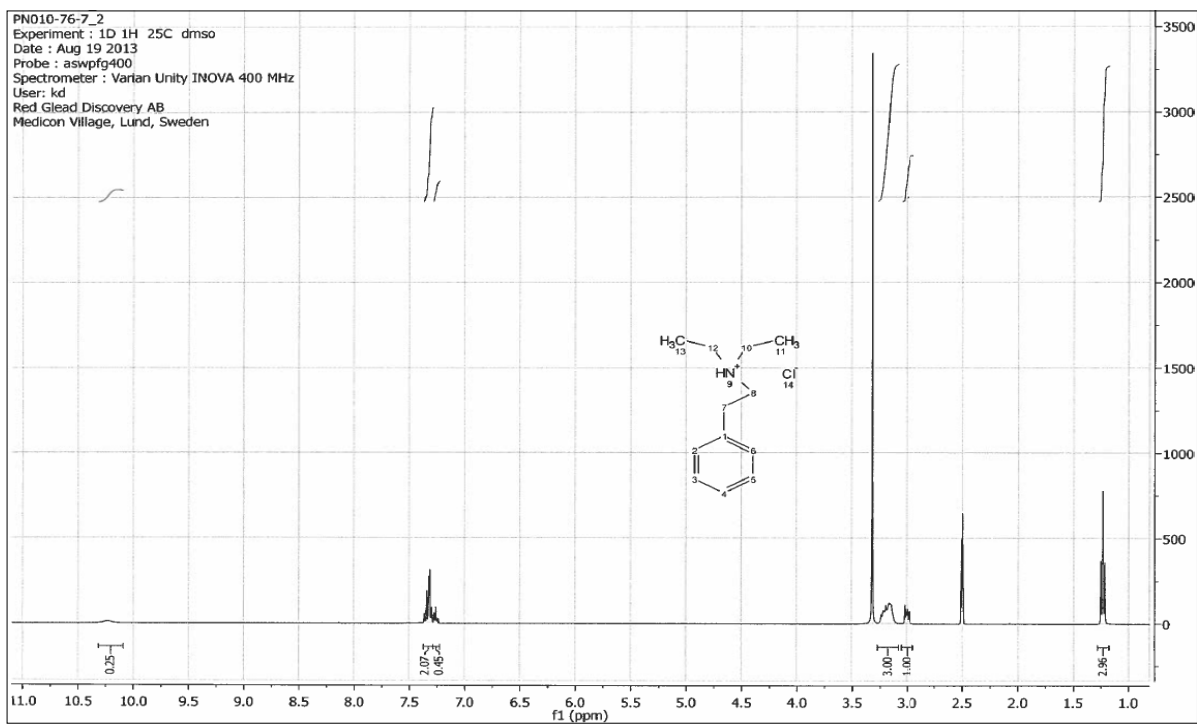

Figure S4. 1D NMR of N,N-DEPA purchased from Red Glead Discovery
